# Supplementary material
Source: PubMed Central journal article supplement (PMC5806154)
Supplement: NIHMS937322-supplement-Supplemental_Information.pdf [file NIHMS937322-supplement-Supplemental_Information.pdf]

# CHEMPHYSICHEM

## Supporting Information

### **Monomer Dynamics of Alzheimer Peptides and Kinetic Control of Early Aggregation in Alzheimer's Disease**

Srabasti Acharya,<sup>[a]</sup> Kinshuk R. Srivastava,<sup>[a]</sup> Sureshbabu Nagarajan,<sup>[a]</sup> and Lisa J. Lapidus\*<sup>[a, b]</sup>

cphc\_201600706\_sm\_miscellaneous\_information.pdf



To avoid going irreversibly to  $O$ ,  $[M^*M^*]$  can dissociate to  $M^*$  and  $M^*$  or reconfigure to  $[MM^*]$ . Thus, for  $k_{-1} \gg k_d$ , the primary flux of dissociation is through  $[MM^*]$ . This complex is not very stable and so immediately comes apart. Therefore we assume that  $[M^*M^*]$  can proceed directly to  $M+M^*$ . Thus, for  $k_{-1}$  and  $k_d$  sufficiently slow, and  $k^{bi}$  sufficiently fast, the model can be approximated by scheme (ii), which has been used in previous versions of this model <sup>[1]</sup>

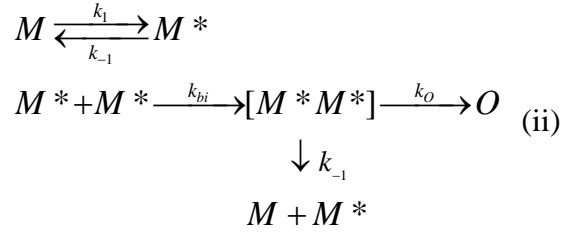

The equations of the full model (scheme (i)) are

$$\begin{aligned}
 \frac{d[M]}{dt} &= -k_1[M] + k_{-1}[M^*] - 2k_+^{bi}[M]^2 - k_+^{bi}[M][M^*] + 2k_-^{bi}[MM] + k_-^{bi}[MM^*] \\
 \frac{d[M^*]}{dt} &= k_1[M] - k_{-1}[M^*] - 2k_+^{bi}[M^*]^2 - k_+^{bi}[M][M^*] + k_-^{bi}[MM^*] + 2k_d[M^*M^*] \\
 \frac{d[MM]}{dt} &= k_+^{bi}[M]^2 - k_-^{bi}[MM] + k_{-1}[MM^*] - k_1[MM] \\
 \frac{d[MM^*]}{dt} &= k_+^{bi}[M][M^*] - k_-^{bi}[MM^*] + k_1[MM] - k_1[MM^*] - k_{-1}[MM^*] + k_{-1}[M^*M^*] \\
 \frac{d[M^*M^*]}{dt} &= k_+^{bi}[M^*]^2 - k_d[M^*M^*] + k_1[MM^*] - k_{-1}[M^*M^*] - k_o[M^*M^*] \\
 \frac{d[O]}{dt} &= k_o[M^*M^*]
 \end{aligned} \tag{S1}$$

Terms containing  $k_{-1}$  have been dropped because we assume  $k_{-1} = 0$ . Solution of the full model is feasible with an ordinary differential equation solver. The initial concentration of the sum of all monomers is equal to 1 and the concentration of all other species equal to 0. The Fig. S1 shows the evolution of all the species over time for the rates given in the table below. The concentration of  $O$  follows bimolecular formation with the equation

$$[O] = [O]_{\max} \left( 1 - \frac{1}{1 + [O]_{\max} k_f t} \right) \tag{S2}$$

where  $[O]_{max} = 0.5$ . The concentration of  $[O]$  for each set of parameters is fitted to Eq. (S2) and  $k_f$  is given in the **Table S1**.

To solve the model we must make an estimate of each rate in Eqs. (S1). The values of  $k_+^{bi}$  and  $k_-^{bi}$  can be calculated from Fick's equation of diffusion

$$K = \frac{k_+^{bi}}{k_-^{bi}} = \frac{4}{3} \pi r^3 N_A / 1000 \quad (S3)$$

$$k_+^{bi} = 4\pi r(D_M + D_{M^*})N_A / 1000 = 3.8 \times 10^8 \text{ M}^{-1} \text{ s}^{-1} \quad (S4)$$

$$k_-^{bi} = \frac{k_+^{bi}}{K} = \frac{3(D_M + D_{M^*})}{r^2} = 9.6 \times 10^7 \text{ s}^{-1} \quad (S5)$$

where  $r \sim 2.5$  nm, the average radius of each monomer **as shown in Fig. 4c**, and the translational diffusion coefficients,  $D_M \sim D_{M^*} \sim 1 \times 10^{-6} \text{ cm}^2 \text{ s}^{-1}$  [2]. For a **(arbitrary but typical)** concentration of 45  $\mu\text{M}$ ,  $k_+^{bi} = 1.7 \times 10^5 \text{ s}^{-1}$ . The equilibrium of free bimolecular diffusion  $K = k_+^{bi}/k_-^{bi} = 0.0019 \text{ M}^{-1}$ , so the concentration of each of  $[MM]$  and  $[MM^*]$  is very low and they come apart very quickly. As can be seen in Fig. S1 the populations of these species are always very low.

We assume there are some stabilizing interactions between two  $M^*$  so that  $k_d \ll k_+^{bi}$  but it is difficult to assess quantitatively. In Table S1 we show results of the model for  $k_+^{bi}/k_d = 10, 1$ , and 0.1, and all produce oligomer formation rates with an order of magnitude of each other.

Therefore, as long as  $k_d$  is much less than the free dissociation rate, assessing this rate is not crucial.

Using a similar formalism for the intramolecular diffusion rate, we estimate the monomer reconfiguration rate from the intramolecular diffusion coefficient and the average size of the chain,  $k_r = 4D/(2\langle r \rangle)^2$ . Using the values in Table 1 calculated for both lengths of the peptide at pH 7.5, we calculate the reconfiguration rate at 40 C for A $\beta$ <sub>42</sub> to be  $k_r = 4.0 \times 10^6 \text{ s}^{-1}$  and for A $\beta$ <sub>40</sub> to be  $k_r = 2.2 \times 10^7 \text{ s}^{-1}$ . This relaxation rate is a sum of the forward and backward reconfiguration processes,  $k_1 + k_{-1} = k_r$ .

A parameter that is difficult to assess is the equilibrium between  $M$  and  $M^*$ , which is required for de-convolving  $k_1$  and  $k_{-1}$ . In Table S1 we show results for  $k_{-1}/k_1$  ranging from .1 to 10 and compare the formation rates of  $O$  for  $A\beta_{42}$  and  $A\beta_{40}$ . The overall rates slow significantly as  $M^*$  is less populated, but the ratio of the formation rates for the two reconfiguration rates given above range from 3.7 to 5.2. Since aggregation is rare, it seems likely that  $M$  is more populated than  $M^*$ .

We also compare results for various estimates of  $k_o$  and the formation rates scale directly with this parameter.  $k_o$  is impossible to assess directly and was chosen to be  $\sim 10^4 \text{ s}^{-1}$  to make solution of differential equations tractable. This value is almost certainly too high, but the overall formation rate of  $[O]$  will scale directly with  $k_o$ , as can be seen in Table S1. If we assume  $k_o$  is the same for different sequences, comparison between  $A\beta$  lengths does not depend on an accurate estimate.

Using the rates derived above and assuming  $k_{-1}/k_1=0.1$ ,  $k_o=1e4 \text{ s}^{-1}$  and  $k_d=1.7e4 \text{ s}^{-1}$ , we solved the Eqs. (S1) for  $A\beta_{42}$  (highlighted in gray in Table S1) and  $A\beta_{40}$  (highlighted in yellow in Table S1). These results are shown in Fig. S1.

| A $\beta$<br>length                           | $k_I$ (s <sup>-1</sup> ) | $k_{-I}$ (s <sup>-1</sup> ) | $k_+^{bi}$ (s <sup>-1</sup> ) | $k_-^{bi}$ (s <sup>-1</sup> ) | $k_d$ (s <sup>-1</sup> ) | $k_o$ (s <sup>-1</sup> ) | $k_f$ from<br>fit<br>(M <sup>-1</sup> s <sup>1</sup> ) | Ratio<br>formation<br>rates |
|-----------------------------------------------|--------------------------|-----------------------------|-------------------------------|-------------------------------|--------------------------|--------------------------|--------------------------------------------------------|-----------------------------|
| Comparing different estimates of $k_d$        |                          |                             |                               |                               |                          |                          |                                                        |                             |
| 42                                            | 2e6                      | 2e6                         | 1.7e5                         | 9.6e7                         | 1.7e6                    | 1e4                      | 451                                                    |                             |
| 42                                            | 2e6                      | 2e6                         | 1.7e5                         | 9.6e7                         | 1.7e5                    | 1e4                      | 755                                                    |                             |
| 42                                            | 2e6                      | 2e6                         | 1.7e5                         | 9.6e7                         | 1.7e4                    | 1e4                      | 810                                                    |                             |
| Comparing different estimates of $k_o$        |                          |                             |                               |                               |                          |                          |                                                        |                             |
| 42                                            | 2e6                      | 2e6                         | 1.7e5                         | 9.6e7                         | 1.7e4                    | 1e4                      | 810                                                    |                             |
| 42                                            | 2e6                      | 2e6                         | 1.7e5                         | 9.6e7                         | 1.7e4                    | 5e3                      | 402                                                    |                             |
| 42                                            | 2e6                      | 2e6                         | 1.7e5                         | 9.6e7                         | 1.7e4                    | 2.5e3                    | 199                                                    |                             |
| Comparing different estimates of $k_I/k_{-I}$ |                          |                             |                               |                               |                          |                          |                                                        |                             |
| 42                                            | 2e6                      | 2e6                         | 1.7e5                         | 9.6e7                         | 1.7e4                    | 1e4                      | 810                                                    | 5.2                         |
| 40                                            | 1.1e7                    | 1.1e7                       | 1.7e5                         | 9.6e7                         | 1.7e4                    | 1e4                      | 157                                                    |                             |
| 42                                            | .8e6                     | 3.2e6                       | 1.7e5                         | 9.6e7                         | 1.7e4                    | 1e4                      | 85.1                                                   | 4.6                         |
| 40                                            | 0.44e7                   | 1.76e7                      | 1.7e5                         | 9.6e7                         | 1.7e4                    | 1e4                      | 18.6                                                   |                             |
| 42                                            | 0.4e6                    | 3.6e6                       | 1.7e5                         | 9.6e7                         | 1.7e4                    | 1e4                      | 19.1                                                   | 4.3                         |
| 40                                            | .22e7                    | 1.98e7                      | 1.7e5                         | 9.6e7                         | 1.7e4                    | 1e4                      | 4.5                                                    |                             |
| 42                                            | 3.6e6                    | 0.4e7                       | 1.7e5                         | 9.6e7                         | 1.7e4                    | 1e4                      | 9709                                                   | 3.7                         |
| 40                                            | 1.98e7                   | .22e7                       | 1.7e5                         | 9.6e7                         | 1.7e4                    | 1e4                      | 2632                                                   |                             |

Table S1. Various parameters used in the solution to Eqs. S8 and the fitted formation rate of  $[O]$ .

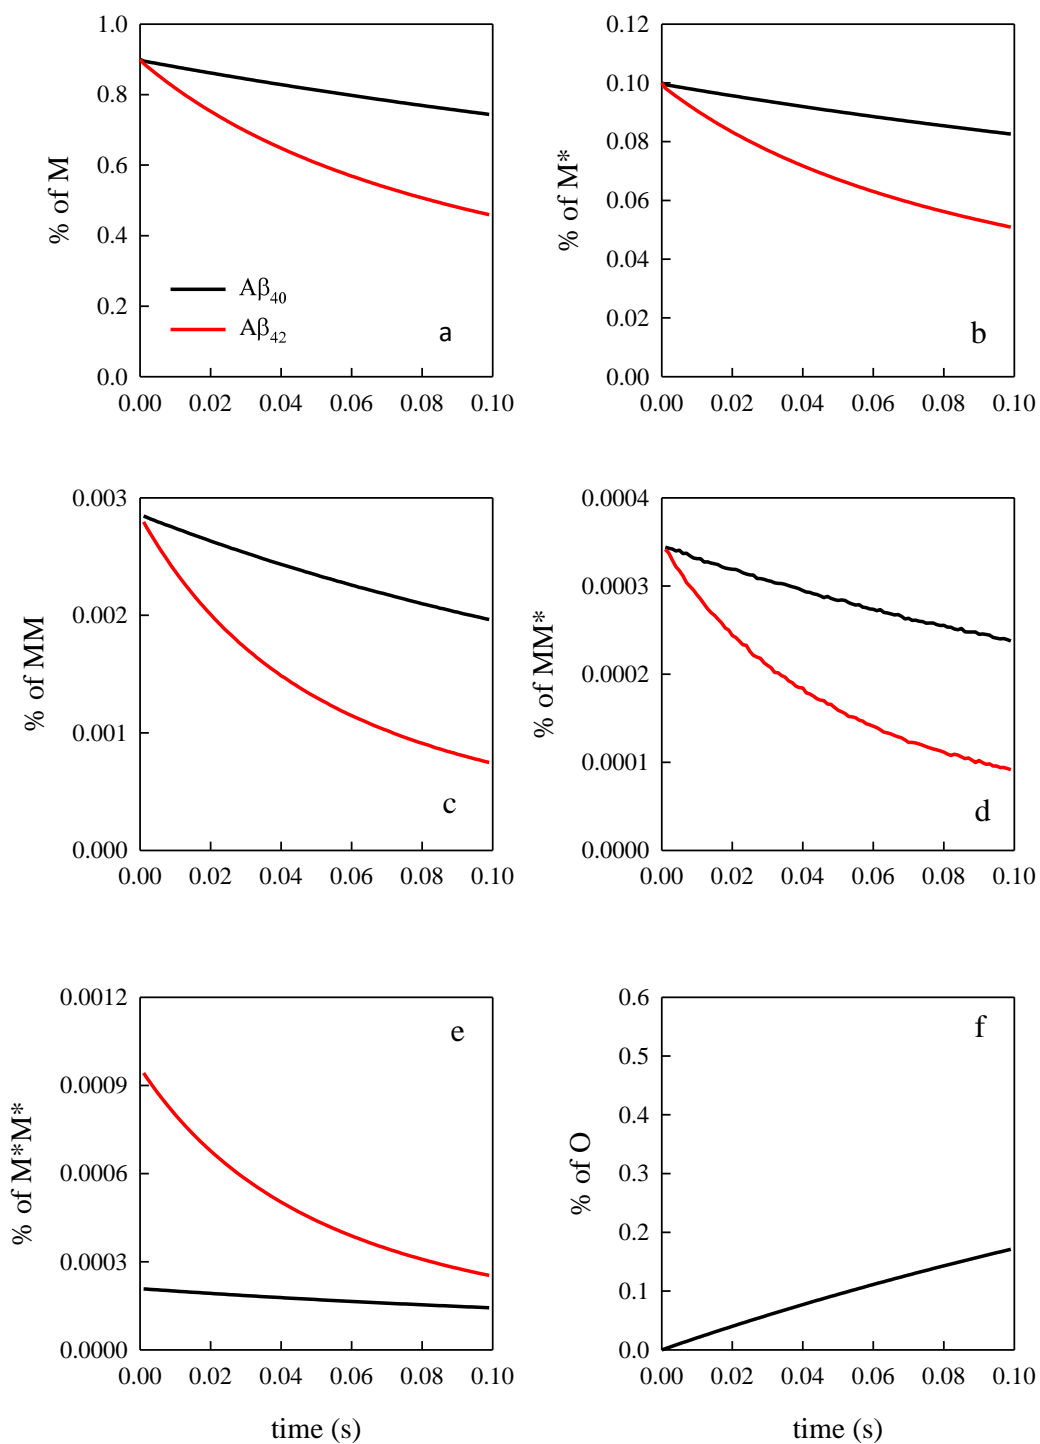

Fig. S1. Computed concentrations versus time for scheme (i) and Eq. (1) for each species (a) M, (b) M\*, (c) MM, (d) MM\*, (e) M\*M\*, (f) O. The black lines represent the aggregation of A $\beta_{40}$  and use the parameters highlighted in yellow in Table S1. The red lines represent the aggregation of A $\beta_{42}$  use the parameters highlighted in grey in Table S1.



- [1] L. J. Lapidus, *Molecular BioSystems* **2013**, 9, 29-35.
- [2] L. J. Lapidus, W. A. Eaton, J. Hofrichter, *Proceedings of the National Academy of Sciences of the United States of America* **2000**, 97, 7220-7225.
